# Supplementary material for: Maximum Entropy Modeling the Distribution Area of Morchella Dill. ex Pers. Species in China under Changing Climate
Source: MDPI journal article supplement (doi:10.3390/biology11071027), 2022-07-08
Supplement: s1 [file s1]

**Table S1.** Geographical distributions of *Morchella* species sampled in this study.

**Table S2.** Types of RCPs and projected temperature increases.

**Figure S1.** Recorded geographical distribution sites of *Morchella* in China.

**Figure S2.** The geographical distribution *Morchella* in LGM and MH period.

**Figure S3.** The current geographical distribution of *Morchella*.

**Figure S4.** The change in potential suitable habitat area of *Morchella* in different climatic scenarios.

**Table S1.** Geographical distributions of *Morchella* species sampled in this study.

| Sample | Location                | Longitude(°E) | Latitude(°N) | Elevation(m) |
|--------|-------------------------|---------------|--------------|--------------|
| 1      | Leqing Zhejiang         | 121.12126     | 28.375913    |              |
| 2      | Longquan Zhejiang       | 119.21612     | 27.939284    |              |
| 3      | Gutian Zhejiang         | 118.752578    | 26.583262    |              |
| 4      | Putuo Zhejiang          | 122.396427    | 30.011219    |              |
| 5      | Dadong Yunnan           | 100.394814    | 27.146212    |              |
| 6      | Tongdian Lanping Yunnan | 99.525078     | 26.692762    |              |
| 7      | Beiya Heqing Yunnan     | 100.18824     | 26.15349     |              |
| 8      | Judian Yunnan           | 99.651031     | 27.297022    |              |
| 9      | Jianchuan Yunnan        | 99.851837     | 26.316273    |              |
| 10     | Hutubi Xinjiang         | 86.883333     | 44.1913888   |              |
| 11     | Chabuchaer Xinjiang     | 81.32416      | 43.91689     |              |
| 12     | Fukang Xinjiang         | 87.9872222    | 44.1569444   |              |
| 13     | Shawan Xinjiang         | 85.1408333    | 43.9577777   |              |
| 14     | Shawan Xinjiang         | 85.8505555    | 44.2897222   |              |
| 15     | Shihezi Xinjiang        | 86.080555     | 44.2897222   |              |
| 16     | Shawan Xinjiang         | 85.628888     | 45.8763888   |              |
| 17     | Chabuchaer Xinjiang     | 81.313709     | 43.9166666   |              |
| 18     | Yanyuan Sichuan         | 100.806444    | 27.817961    | 2863         |
| 19     | Yanyuan Sichuan         | 100.806194    | 27.818286    | 2885         |
| 20     | Yanyuan Sichuan         | 100.806275    | 27.818422    | 2893         |
| 21     | Yanyuan Sichuan         | 100.80645     | 27.818611    | 2904         |
| 22     | Huidong Sichuan         | 102.545502    | 26.613497    | 1734         |
| 23     | Mianning Sichuan        | 102.20643     | 28.356441    | 1837         |
| 24     | Qianjiang Chongqing     | 108.771086    | 29.53322     |              |
| 25     | Xiaojin Sichuan         | 102.369426    | 31.002209    | 2911.7       |
| 26     | Xuanhan Sichuan         | 107.7217      | 31.35386     | 1525.7       |
| 27     | Beichuan Sichuan        | 104.30755     | 31.89148     | 1225.6       |
| 28     | Qingchuan Sichuan       | 105.245407    | 32.581617    | 831.7        |
| 29     | Jiuzhaigou Sichuan      | 104.23567     | 33.26142     | 2155.6       |
| 30     | Kangping Liaoning       | 123.460277    | 42.963888    |              |
| 31     | Kangping Liaoning       | 123.225277    | 42.629166    |              |
| 32     | Kangping Liaoning       | 123.207777    | 42.581944    |              |
| 33     | Shangri-La Yunnan       | 99.46151      | 27.698362    |              |
| 34     | Taishan Shandong        | 117.391838    | 36.017612    |              |
| 35     | Taishan Shandong        | 117.097923    | 36.308891    |              |
| 36     | Zhuolu Hebei            | 115.211383    | 40.385834    |              |
| 37     | Kanasi Xinjiang         | 87.042951     | 48.700435    |              |
| 38     | Zhaosu Xinjiang         | 80.35         | 42.41        | 2630         |
| 39     | Urumchi Xinjiang        | 86.59         | 43.3         | 1490         |
| 40     | Shangri-La Yunnan       | 99.46         | 28.01        | 3128         |

|    |                    |            |            |        |
|----|--------------------|------------|------------|--------|
| 41 | Ranwu Xizang       | 96.4       | 29.29      | 3900   |
| 42 | Lulang Xizang      | 94.44      | 29.46      | 3472   |
| 43 | Banma Qinghai      | 100.49     | 32.88      | 3000   |
| 44 | Minhe Qinghai      | 102.48     | 36.19      | 2746   |
| 45 | Hongyuan Sichuan   | 102.36     | 32         | 1970   |
| 46 | Tianzhu, Gansu     | 102.84     | 37.24      | 3354   |
| 47 | Diebu Gansu        | 103.13     | 34.03      | 2387   |
| 48 | Zhouqu Gansu       | 104.22     | 33.45      | 1369   |
| 49 | Malu Gansu         | 103.31     | 34.5       | 2811   |
| 50 | Zhamashi Qinghai   | 100.03     | 38.12      | 2744   |
| 51 | Zhugu Qinghai      | 102.06     | 37.1       | 3100   |
| 52 | Fangshan Shanxi    | 111.21     | 37.49      | 1619   |
| 53 | Fu Shaanxi         | 109.22     | 35.59      | 938    |
| 54 | Jiuzhaigou Sichuan | 103.55     | 33.15      | 2435   |
| 55 | Maerkang Sichuan   | 102.37     | 31.52      | 3358   |
| 56 | Laojunshan Yunnan  | 99.27      | 27.11      | 2555   |
| 57 | Altay Xinjiang     | 88.14023   | 47.84564   |        |
| 58 | Urumchi Xinjiang   | 88.31104   | 43.36378   |        |
| 59 | Shihezi Xinjiang   | 86.07893   | 44.30653   |        |
| 60 | Akxoki Xinjiang    | 82.98046   | 46.74532   |        |
| 61 | Wudu Gansu         | 104.92667  | 33.39189   |        |
| 62 | Kang Gansu         | 105.60855  | 33.32937   |        |
| 63 | Wen Gansu          | 104.68343  | 32.94396   |        |
| 64 | Cheng Gansu        | 105.74222  | 33.75062   |        |
| 65 | Zhouzhi Shaanxi    | 108.3415   | 33.9289333 | 993.5  |
| 66 | Dayu Shaanxi       | 109.12695  | 33.9177833 | 1557.5 |
| 67 | Mei Shaanxi        | 107.804166 | 34.0177    | 2010   |
| 68 | Ningshan Shaanxi   | 108.491766 | 33.4793    | 2450.5 |
| 69 | Ningshan Shaanxi   | 108.555783 | 33.6422    | 1181.5 |
| 70 | Ningshan Shaanxi   | 108.793883 | 33.60805   | 1088.5 |
| 71 | Shanyang Shaanxi   | 106.52666  | 31.632216  | 1100   |
| 72 | Shangzhou Shaanxi  | 109.94083  | 33.84695   | 1005   |
| 73 | Zhashui Shaanxi    | 109.542216 | 33.769716  | 1572   |
| 74 | Mian Shaanxi       | 106.84555  | 33.338616  | 1950   |
| 75 | Nanming Guizhou    | 106.759238 | 26.552863  |        |
| 76 | Huaxi Guizhou      | 106.676441 | 26.415879  |        |
| 77 | Xiahe Guizhou      | 106.636577 | 26.653325  |        |
| 78 | Liupanshui Guizhou | 104.837555 | 26.598833  |        |
| 79 | Wuchuan Guizhou    | 107.905456 | 28.569077  |        |
| 80 | Dejiang Guizhou    | 108.126411 | 28.270423  |        |
| 81 | Bijiang Guizhou    | 109.187435 | 27.696773  |        |
| 82 | Jiangkou Guizhou   | 108.8454   | 27.705922  |        |
| 83 | Shiqian Guizhou    | 108.230464 | 27.519722  |        |
| 84 | Yuping Guizhou     | 108.912578 | 27.241523  |        |

|     |                    |            |            |      |
|-----|--------------------|------------|------------|------|
| 85  | Sinan Guizhou      | 108.259417 | 27.944548  |      |
| 86  | Baoshan Yunnan     | 98.703055  | 25.251944  | 3170 |
| 87  | Baoshan Yunnan     | 98.461111  | 27.843055  | 2850 |
| 88  | Baoshan Yunnan     | 98.833611  | 25.432777  | 1410 |
| 89  | Baoshan Yunnan     | 98.690833  | 25.945833  | 1060 |
| 90  | Linan Zhejiang     | 119.436458 | 30.353794  |      |
| 91  | Qingyuan Zhejiang  | 119.217434 | 27.757088  |      |
| 92  | Loufan Shanxi      | 111.79745  | 38.0672    |      |
| 93  | Jiaocheng Shanxi   | 111.483284 | 37.84269   |      |
| 94  | Fenyang Shanxi     | 111.78777  | 37.26542   |      |
| 95  | Xiangshan Zhejiang | 121.721388 | 29.46      |      |
| 96  | Heshun Shanxi      | 113.57032  | 37.32963   |      |
| 97  | Xiaojin Sichuan    | 102.3644   | 30.99918   |      |
| 98  | Jiancaoping Shanxi | 112.48699  | 37.94036   |      |
| 99  | Jiaocheng Shanxi   | 112.15478  | 37.55165   |      |
| 100 | Shouyang Shanxi    | 113.17666  | 37.89498   |      |
| 101 | Yushe Shanxi       | 112.97522  | 37.07084   |      |
| 102 | Wutai Shanxi       | 113.2554   | 38.72812   |      |
| 103 | Xiyang Shanxi      | 113.70718  | 37.61282   |      |
| 104 | Lingchuan Shanxi   | 113.28061  | 35.77512   |      |
| 105 | Shangri-La Yunnan  | 99.74317   | 27.84254   |      |
| 106 | Weixi Yunnan       | 99.341202  | 27.566418  |      |
| 107 | Fuwen Xinjiang     | 88.98046   | 46.74532   |      |
| 108 | Shangri-La Yunnan  | 99.79126   | 27.582403  |      |
| 109 | Hui Gansu          | 106.08785  | 33.76884   |      |
| 110 | Jianchuan Yunnan   | 99.8166666 | 26.6333333 |      |
| 111 | Barkam Sichuan     | 102.616666 | 31.866666  |      |
| 112 | Lueyang Shaanxi    | 105.883333 | 33.25      |      |
| 113 | Changji Xinjiang   | 87.2166666 | 44.366666  |      |
| 114 | Yulong Yunnan      | 99.45      | 27.2166666 |      |
| 115 | Fu Shaanxi         | 109.016666 | 35.866666  |      |
| 116 | Pengshui Chongqing | 108.172578 | 29.299462  |      |
| 117 | Longyang Yunnan    | 99.243161  | 24.9689    |      |
| 118 | Longyang Yunnan    | 99.260234  | 25.160723  |      |
| 119 | Longyang Yunnan    | 98.847174  | 24.968641  |      |
| 120 | Zhouqu Gansu       | 104.37749  | 33.790815  |      |
| 121 | Luqu Gansu         | 102.494424 | 34.597087  |      |
| 122 | Xiahe Gansu        | 102.528577 | 35.208324  |      |
| 123 | Lintan Gansu       | 103.360533 | 34.698639  |      |
| 124 | Zhuoni Gansu       | 103.513616 | 34.594916  |      |
| 125 | Jiuzhaigou Sichuan | 104.249547 | 33.257592  |      |
| 126 | Li Sichuan         | 103.173511 | 31.44255   |      |
| 127 | Jinchuan Sichuan   | 102.07061  | 31.482006  |      |
| 128 | Barkam Sichuan     | 102.213502 | 31.911748  |      |

|     |                     |            |           |
|-----|---------------------|------------|-----------|
| 129 | Kangding Sichuan    | 101.963555 | 30.004407 |
| 130 | Ruoergai Sichuan    | 102.974391 | 33.584377 |
| 131 | Luhuo Sichuan       | 100.682397 | 31.397992 |
| 132 | Daowu Sichuan       | 101.13154  | 30.985326 |
| 133 | Rangtang Sichuan    | 100.985583 | 32.271093 |
| 134 | Xichang Sichuan     | 102.271484 | 27.900581 |
| 135 | Wenchuan Sichuan    | 103.34628  | 30.880388 |
| 136 | Wenchuan Sichuan    | 103.337201 | 30.904286 |
| 137 | Wenchuan Sichuan    | 103.482754 | 31.123078 |
| 138 | Wenchuan Sichuan    | 103.550688 | 31.539906 |
| 139 | Wenchuan Sichuan    | 103.559224 | 31.591701 |
| 140 | Yuexi Anhui         | 116.366555 | 30.855228 |
| 141 | Taihu Anhui         | 116.315476 | 30.460113 |
| 142 | Susong Anhui        | 116.135524 | 30.159787 |
| 143 | Jinzhai Anhui       | 115.940441 | 31.733462 |
| 144 | Xiao Anhui          | 116.953585 | 34.194269 |
| 145 | Shucheng Anhui      | 116.955602 | 31.467692 |
| 146 | Huocheng Xinjiang   | 80.885281  | 44.06225  |
| 147 | Xinyuan Xinjiang    | 83.267022  | 43.435927 |
| 148 | Gongliu Xinjiang    | 82.238226  | 43.488486 |
| 149 | Zhaosu Xinjiang     | 81.137378  | 43.163497 |
| 150 | Nilka Xinjinag      | 82.518008  | 43.804595 |
| 151 | Pingquan Hebei      | 118.654232 | 41.239373 |
| 152 | Shuangqiao Hebei    | 117.8862   | 41.036891 |
| 153 | Pingquan Hebei      | 118.780345 | 41.226422 |
| 154 | Pingquan Hebei      | 118.52472  | 41.207198 |
| 155 | Pingquan Hebei      | 118.707427 | 41.023756 |
| 156 | Yuanping Shanxi     | 112.717487 | 38.736476 |
| 157 | Jingle Shanxi       | 111.945432 | 38.365147 |
| 158 | Xinzhou Shanxi      | 112.740624 | 38.422383 |
| 159 | Fangshan Shanxi     | 111.25037  | 37.90102  |
| 160 | Zuoquan Shanxi      | 113.385452 | 37.088555 |
| 161 | Deqin Yunnan        | 99.309807  | 27.803802 |
| 162 | Deqin Yunnan        | 98.873475  | 28.300246 |
| 163 | Deqin Yunnan        | 98.691677  | 28.726924 |
| 164 | Sunan Gansu         | 98.550839  | 39.209378 |
| 165 | Hunnan Liaoning     | 123.64983  | 41.942101 |
| 166 | Heishan Liaoning    | 122.132926 | 41.659497 |
| 167 | Chaoyang Liaoning   | 120.39619  | 41.503745 |
| 168 | Jianping Liaoning   | 119.64938  | 41.409456 |
| 169 | Xinmin Liaoning     | 122.842529 | 41.991513 |
| 170 | Qingyuan Liaoning   | 124.93036  | 42.106761 |
| 171 | Wafangdian Liaoning | 121.554961 | 39.521578 |
| 172 | Pingjiang Hunan     | 113.587604 | 28.707564 |

|     |                   |            |           |
|-----|-------------------|------------|-----------|
| 173 | Liuyang Hunan     | 113.649398 | 28.169832 |
| 174 | Fenghuang Hunan   | 109.605527 | 27.953848 |
| 175 | Yuanling Hunan    | 110.402659 | 28.460358 |
| 176 | Fuyang Zhejiang   | 119.797368 | 30.009596 |
| 177 | Gucheng Yunnan    | 100.22549  | 26.87721  |
| 178 | Gucheng Yunnan    | 100.264084 | 26.700333 |
| 179 | Hami Xinjiang     | 93.51465   | 42.82699  |
| 180 | Xiaoshan Zhejiang | 120.235462 | 30.187587 |

---

**Table S2.** Types of RCPs and projected temperature increases.

| Scenario | Radiative forcing                                       | Projected temperature increases |
|----------|---------------------------------------------------------|---------------------------------|
| RCP2.6   | Decrease after the peak ( $3\text{W/m}^2$ ) before 2100 | 1.6-3.6°C / 2.4 °C              |
| RCP4.5   | Stable at $4.5\text{W/m}^2$ after 2100                  | 2.4-5.5 °C/3.6 °C               |
| RCP8.5   | $8.5\text{W/m}^2$ in 2100                               | 4.6-10.3 °C/6.9 °C              |

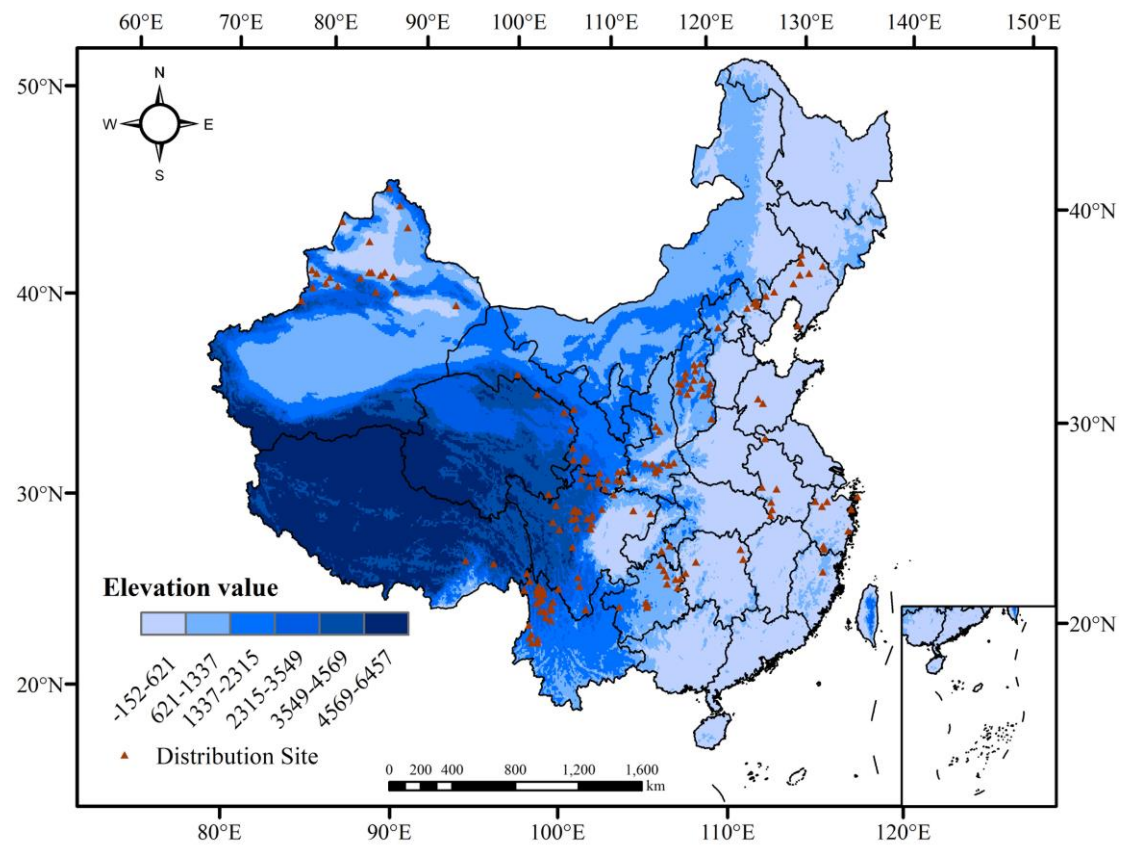

**Figure S1.** Recorded geographical distribution distribution sites of *Morchella* in China.



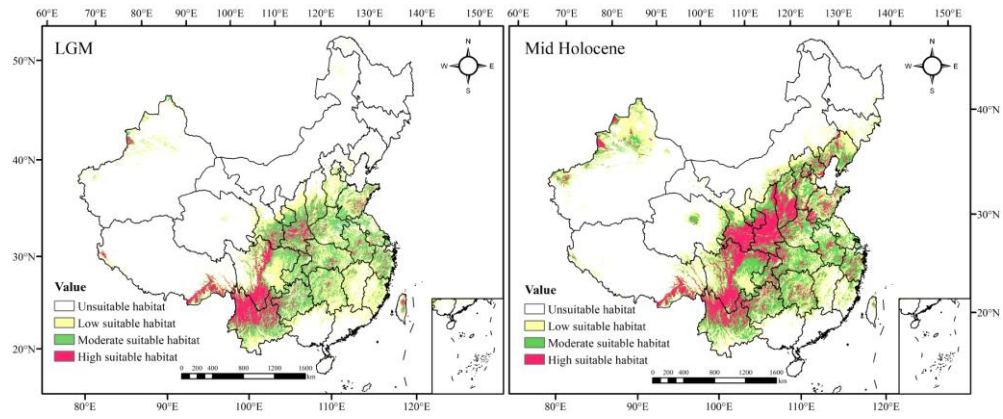

**Figure S2.** The geographical distribution *Morchella* in LGM and MH period.

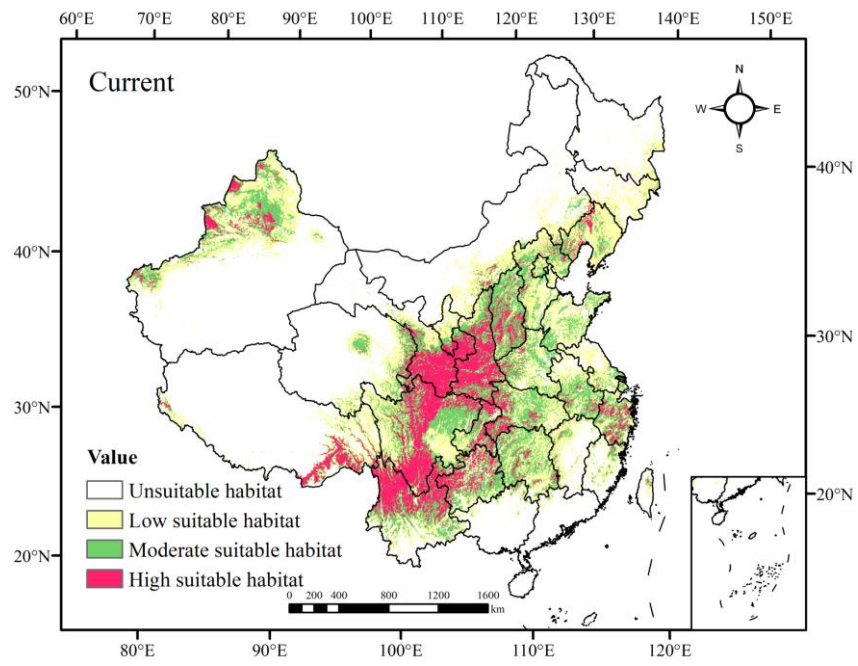

**Figure S3.** The current geographical distribution of *Morchella*.

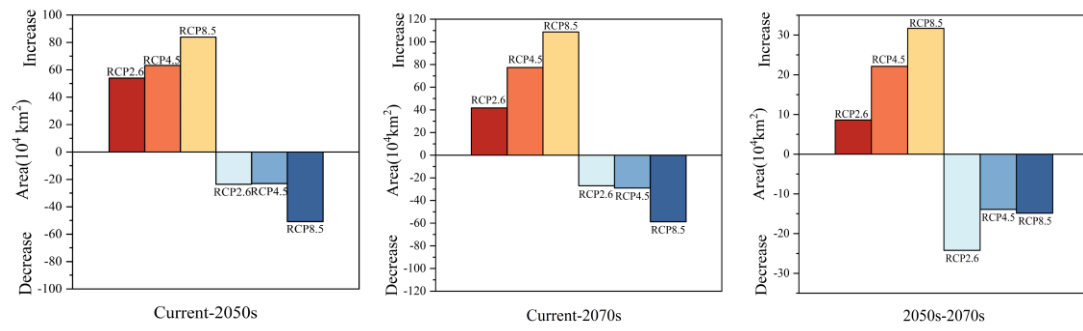

**Figure S4.** The change in potential suitable habitat area of *Morchella* in different climatic scenarios.
